# Supplementary material for: Acute effects of traditional Japanese alcohol beverages on blood glucose and polysomnography levels in healthy subjects
Source: PeerJ. 2016 Apr 4;4:e1853. doi: 10.7717/peerj.1853 (PMC4824916; doi:10.7717/peerj.1853)
Supplement: Supplemental Information 1 [file peerj-04-1853-s001.xlsx]

## Sheet: alcohol
Blood alcohol
No	Water0	Water1	Water2	Water12	0-1ｈ	1-2h	2-12ｈ	0-2ｈ total	0-12h total		No	Beer0	Beer1	Beer2	Beer12	0-1ｈ	1-2h	2-12ｈ	0-2ｈ total	0-12h total		No	Shochu0	Shochu1	Shochu2	Shochu12	0-1ｈ	1-2h	2-12ｈ	0-2ｈ total	0-12h total		No	Sake0	Sake1	Sake2	Sake12	0-1ｈ	1-2h	2-12ｈ	0-2ｈ total	0-12h total
1	0	0	0	0	0	0	0	0	0		1	0	0.8	0.8	0	24	48	240	72	312		1	0	0.7	0.6	0	21	39	180	60	240		1	0	0.7	0.6	0	21	39	180	60	240
2	0	0	0	0	0	0	0	0	0		2	0	0.9	0.5	0	27	42	150	69	219		2	0	0.2	0.3	0.1	6	15	120	21	141		2	0.1	0.5	0.3	0	18	24	90	42	132
3	0	0	0	0	0	0	0	0	0		3	0	0.8	0.5	0	24	39	150	63	213		3	0	0.4	0.6	0	12	30	180	42	222		3	0	0.4	0.3	0	12	21	90	33	123
4	0	0	0	0	0	0	0	0	0		4	0	0.5	0.3	0	15	24	90	39	129		4	0	0.5	0.4	0	15	27	120	42	162		4	0	0.3	0.4	0	9	21	120	30	150
5	0	0	0	0	0	0	0	0	0		5	0	0.9	0.6	0	27	45	180	72	252		5	0	0.8	0.7	0	24	45	210	69	279		5	0	0.9	0.7	0	27	48	210	75	285
mean	0	0	0	0	0	0	0	0	0		mean	0	0.78	0.54	0	23.4	39.6	162	63	225		mean	0	0.52	0.52	0.02	15.6	31.2	162	46.8	208.8		mean	0.02	0.56	0.46	0	17.4	30.6	138	48	186
SD	0	0	0	0	0	0	0	0	0		SD	0	0.164317	0.181659	0	4.9295	9.34345	54.4977	13.9104	66.5094		SD	0	0.238747	0.164317	0.0447214	7.1624	11.5412	40.2492	18.5661	56.7071		SD	0.0447214	0.240832	0.181659	0	7.1624	12.2597	54.4977	19.0919	72.2807
SE	0	0	0	0	0	0	0	0	0		SE	0	0.0734847	0.0812404	0	2.20454	4.17852	24.3721	6.22093	29.7439		SE	0	0.106771	0.0734847	0.02	3.20312	5.1614	18	8.30301	25.3602		SE	0.02	0.107703	0.0812404	0	3.20312	5.4827	24.3721	8.53815	32.3249
0-12h
	0	1	2	12		2hAUC	Water	Beer	Shochu	Sake			12hAUC	Water	Beer	Shochu	Sake
Water (n=5)	0	0	0	0			0	63	46.8	48				0	225	208.8	186
Beer (n=5)	0	0.78	0.54	0			0	6.22093	8.30301	8.53815				0	29.7439	25.3602	32.3249
Shochu (n=5)	0	0.52	0.52	0.02
Sake (n=5)	0.02	0.56	0.46	0
SE	0	1	2	12
Water (n=5)	0	0	0	0
Beer (n=5)	0	0.0734847	0.0812404	0
Shochu (n=5)	0	0.106771	0.0734847	0.02
Sake (n=5)	0.02	0.107703	0.0812404	0

## Sheet: blood glucose
Blood glucose
No	Water0	Water1	Water2	Water12	0-1ｈ	1-2h	2-12ｈ	0-2ｈ total	0-12h total		No	Beer0	Beer1	Beer2	Beer12	0-1ｈ	1-2h	2-12ｈ	0-2ｈ total	0-12h total		No	Shochu0	Shochu1	Shochu2	Shochu12	0-1ｈ	1-2h	2-12ｈ	0-2ｈ total	0-12h total		No	Sake0	Sake1	Sake2	Sake12	0-1ｈ	1-2h	2-12ｈ	0-2ｈ total	0-12h total
1	74	140	138	83	1980	3900	2700	5880	8580		1	82	192	128	80	3300	4680	-600	7980	7980		1	74	91	84	82	510	810	2400	1320	3720		1	90	86	93	86	-120	-30	-1200	0	0
2	77	146	155	92	2070	4410	4500	6480	10980		2	84	157	174	84	2190	4890	0	7080	7080		2	93	85	108	93	-240	210	0	210	210		2	83	131	90	87	1440	1650	1200	1650	4290
3	102	129	87	93	810	360	-2700	1170	1170		3	86	168	124	79	2460	3600	-2100	6060	6060		3	101	100	92	87	-30	-300	-4200	0	0		3	97	128	116	84	930	1500	-3900	0	2430
4	89	150	118	85	1830	2700	-1200	4530	4530		4	87	176	98	89	2670	3000	600	5670	6270		4	90	118	100	82	840	1140	-2400	1980	1980		4	89	136	93	92	1410	1530	900	2940	3840
5	80	128	111	89	1440	2370	2700	3810	6510		5	87	193	93	83	3180	3360	-1200	6540	6540		5	86	112	136	87	780	2280	300	3060	3360		5	84	164	99	89	2400	2850	1500	5250	6750
mean	84.4	138.6	121.8	88.4	1626	2748	1200	4374	6354		mean	85.2	177.2	123.4	83	2760	3906	-660	6666	6786		mean	88.8	101.2	104	86.2	372	828	-780	1314	1854		mean	88.6	129	98.2	87.6	1212	1500	-300	1968	3462
SD	11.327	9.88939	26.0135	4.3359	515.878	1576.16	3014.96	2080.34	3760.99		SD	2.16795	15.5145	32.2149	3.937	471.964	833.655	1047.85	904.588	769.077		SD	9.93479	13.8456	20	4.54973	484.943	982.38	2559.69	1268.61	1725.25		SD	5.59464	27.9643	10.4738	3.04959	916.008	1023.08	2274.86	2211.53	2484.45
SE	5.06557	4.42267	11.6336	1.93907	230.708	704.879	1348.33	930.358	1681.96		SE	0.969536	6.9383	14.4069	1.76068	211.069	372.822	468.615	404.544	343.942		SE	4.44297	6.19193	8.94427	2.0347	216.873	439.334	1144.73	567.341	771.554		SE	2.502	12.506	4.68402	1.36382	409.651	457.537	1017.35	989.027	1111.08
1-12h							2h AUC							12h AUC
	0	1	2	12				Water	Beer	Shochu	Sake				Water	Beer	Shochu	Sake
Water (n=5)	84.4	138.6	121.8	88.4				4374	6666	1314	1968				6354	6786	1854	3462
Beer (n=5)	85.2	177.2	123.4	83			SE	930.358	404.544	567.341	989.027			SE	1681.96	343.942	771.554	1111.08
Shochu (n=5)	88.8	101.2	104	86.2
Sake (n=5)	88.6	129	98.2	87.6
SE	0	1	2	12
Water (n=5)	5.06557	4.42267	11.6336	1.93907
Beer (n=5)	0.969536	6.9383	14.4069	1.76068
Shochu (n=5)	4.44297	6.19193	8.94427	2.0347
Sake (n=5)	2.502	12.506	4.68402	1.36382
																											＊ ： vs Control
																											## ： vs Beer

## Sheet: insulin
Insulin
No	Water0	Water1	Water2	Water12	0-1ｈ	1-2h	2-12ｈ	0-2ｈ total	0-12h total		No	Beer0	Beer1	Beer2	Beer12	0-1ｈ	1-2h	2-12ｈ	0-2ｈ total	0-12h total		No	Shochu0	Shochu1	Shochu2	Shochu12	0-1ｈ	1-2h	2-12ｈ	0-2ｈ total	0-12h total		No	Sake0	Sake1	Sake2	Sake12	0-1ｈ	1-2h	2-12ｈ	0-2ｈ total	0-12h total
1	2.1	30	13.6	3.2	837	1182	330	2019	2349		1	2.3	53.4	33.9	3.2	1533	2481	270	4284	2751		1	2.5	26.3	14.9	2.8	714	1086	90	1800	1890		1	3.9	23.8	20.3	3.2	597	1089	-210	1686	1686
2	2.3	46.8	76	7.5	1335	3546	1560	4881	6441		2	3.6	39.9	164.2	3.6	1089	5907	0	6996	5907		2	18.5	52.3	62.5	7.4	1014	2334	-3330	3348	3348		2	2.8	37.1	33.7	5.4	1029	1956	780	2985	3765
3	16.9	64	46.7	10.2	1413	2307	-2010	3720	3720		3	6.7	148.9	116.3	4.8	4266	7554	-570	11820	6984		3	21.2	54.1	31	4.4	987	1281	-5040	2268	2268		3	11.3	114	96	5.3	3081	5622	-1800	8703	8703
4	3.2	51.5	39.1	4.8	1449	2526	480	3975	4455		4	2.9	77.8	61.3	5.5	2247	3999	780	7026	4779		4	1.7	32.1	35	2.9	912	1911	360	2823	3183		4	2.1	42.8	49.2	2.9	1221	2634	240	3855	4095
5	2.9	19.4	10.4	2.9	495	720	0	1215	1215		5	1.8	34	18.1	2.5	966	1455	210	2631	1665		5	2.1	11.3	24.9	2.5	276	960	120	1236	1356		5	1.3	36.3	17.6	2.8	1050	1539	450	2589	3039
mean	5.48	42.34	37.16	5.72	1105.8	2056.2	72	3162	3636		mean	3.46	70.8	78.76	3.92	2020.2	4279.2	138	6551.4	4417.2		mean	9.2	35.22	33.66	4	780.6	1514.4	-1560	2295	2409		mean	4.28	50.8	43.36	3.92	1395.6	2568	-108	3963.6	4257.6
SD	6.39937	17.6881	26.8071	3.0979	421.314	1123.92	1302.6	1502.04	2003.96		SD	1.9321	46.7986	60.6345	1.21532	1351.93	2483.05	488.641	3488.97	2196		SD	9.77292	18.0945	17.8136	2.03838	305.532	586.173	2473.59	829.884	848.358		SD	4.03881	36.0041	31.9911	1.31415	969.878	1799.45	1011.72	2761.72	2651.83
SE	2.86189	7.91035	11.9885	1.38542	188.417	502.632	582.541	671.735	896.199		SE	0.86406	20.929	27.1166	0.543507	604.603	1110.45	218.527	1560.32	982.082		SE	4.37058	8.09212	7.96647	0.911592	136.638	262.145	1106.22	371.135	379.397		SE	1.80621	16.1015	14.3069	0.587707	433.743	804.739	452.453	1235.08	1185.93
0-12h								2h AUC						12h AUC
	0	1	2	12					Water	Beer	Shochu	Sake			Water	Beer	Shochu	Sake
Water (n=5)	5.48	42.34	37.16	5.72					3162	6551.4	2295	3963.6			3636	4417.2	2409	4257.6
Beer (n=5)	3.46	70.8	78.76	3.92				SE	671.735	1560.32	371.135	1235.08		SE	896.199	982.082	379.397	1185.93
Shochu (n=5)	9.2	35.22	33.66	4
Sake (n=5)	4.28	50.8	43.36	3.92
SE	0	1	2	12
Water (n=5)	2.86189	7.91035	11.9885	1.38542
Beer (n=5)	0.86406	20.929	27.1166	0.543507
Shochu (n=5)	4.37058	8.09212	7.96647	0.911592
Sake (n=5)	1.80621	16.1015	14.3069	0.587707

## Sheet: GI ratio
Blood glucose/insulin
Blood glucose
No	Water0	Water1	Water2	Water12	0-1ｈ	1-2h	2-12ｈ	0-2ｈ total	0-12h total		No	Beer0	Beer1	Beer2	Beer12	0-1ｈ	1-2h	2-12ｈ	0-2ｈ total	0-12h total		No	Shochu0	Shochu1	Shochu2	Shochu12	0-1ｈ	1-2h	2-12ｈ	0-2ｈ total	0-12h total		No	Sake0	Sake1	Sake2	Sake12	0-1ｈ	1-2h	2-12ｈ	0-2ｈ total	0-12h total
1	74	140	138	83	1980	3900	2700	5880	8580		1	82	192	128	80	3300	4680	-600	7980	7980		1	74	91	84	82	510	810	2400	1320	3720		1	90	86	93	86	-120	-30	-1200	0	0
2	77	146	155	92	2070	4410	4500	6480	10980		2	84	157	174	84	2190	4890	0	7080	7080		2	93	85	108	93	-240	210	0	210	210		2	83	131	90	87	1440	1650	1200	1650	4290
3	102	129	87	93	810	360	-2700	1170	1170		3	86	168	124	79	2460	3600	-2100	6060	6060		3	101	100	92	87	-30	-300	-4200	0	0		3	97	128	116	84	930	1500	-3900	0	2430
4	89	150	118	85	1830	2700	-1200	4530	4530		4	87	176	98	89	2670	3000	600	5670	6270		4	90	118	100	82	840	1140	-2400	1980	1980		4	89	136	93	92	1410	1530	900	2940	3840
5	80	128	111	89	1440	2370	2700	3810	6510		5	87	193	93	83	3180	3360	-1200	6540	6540		5	86	112	136	87	780	2280	300	3060	3360		5	84	164	99	89	2400	2850	1500	5250	6750
mean	84.4	138.6	121.8	88.4	1626	2748	1200	4374	6354		mean	85.2	177.2	123.4	83	2760	3906	-660	6666	6786		mean	88.8	101.2	104	86.2	372	828	-780	1314	1854		mean	88.6	129	98.2	87.6	1212	1500	-300	1968	3462
SD	11.327	9.88939	26.0135	4.3359	515.878	1576.16	3014.96	2080.34	3760.99		SD	2.16795	15.5145	32.2149	3.937	471.964	833.655	1047.85	904.588	769.077		SD	9.93479	13.8456	20	4.54973	484.943	982.38	2559.69	1268.61	1725.25		SD	5.59464	27.9643	10.4738	3.04959	916.008	1023.08	2274.86	2211.53	2484.45
SE	5.06557	4.42267	11.6336	1.93907	230.708	704.879	1348.33	930.358	1681.96		SE	0.969536	6.9383	14.4069	1.76068	211.069	372.822	468.615	404.544	343.942		SE	4.44297	6.19193	8.94427	2.0347	216.873	439.334	1144.73	567.341	771.554		SE	2.502	12.506	4.68402	1.36382	409.651	457.537	1017.35	989.027	1111.08
Insulin
No	Water0	Water1	Water2	Water12	0-1ｈ	1-2h	2-12ｈ	0-2ｈ total	0-12h total		No	Beer0	Beer1	Beer2	Beer12	0-1ｈ	1-2h	2-12ｈ	0-2ｈ total	0-12h total		No	Shochu0	Shochu1	Shochu2	Shochu12	0-1ｈ	1-2h	2-12ｈ	0-2ｈ total	0-12h total		No	Sake0	Sake1	Sake2	Sake12	0-1ｈ	1-2h	2-12ｈ	0-2ｈ total	0-12h total
1	2.1	30	13.6	3.2	837	1182	330	2019	2349		1	2.3	53.4	33.9	3.2	1533	2481	270	4014	4284		1	2.5	26.3	14.9	2.8	714	1086	90	1800	1890		1	3.9	23.8	20.3	3.2	597	1089	-210	1686	1686
2	2.3	46.8	76	7.5	1335	3546	1560	4881	6441		2	3.6	39.9	164.2	3.6	1089	5907	0	6996	6996		2	18.5	52.3	62.5	7.4	1014	2334	-3330	3348	3348		2	2.8	37.1	33.7	5.4	1029	1956	780	1956	3765
3	16.9	64	46.7	10.2	1413	2307	-2010	3720	3720		3	6.7	148.9	116.3	4.8	4266	7554	-570	11820	11820		3	21.2	54.1	31	4.4	987	1281	-5040	2268	2268		3	11.3	114	96	5.3	3081	5622	-1800	0	8703
4	3.2	51.5	39.1	4.8	1449	2526	480	3975	4455		4	2.9	77.8	61.3	5.5	2247	3999	780	6246	7026		4	1.7	32.1	35	2.9	912	1911	360	2823	3183		4	2.1	42.8	49.2	2.9	1221	2634	240	3855	4095
5	2.9	19.4	10.4	2.9	495	720	0	1215	1215		5	1.8	34	18.1	2.5	966	1455	210	2421	2631		5	2.1	11.3	24.9	2.5	276	960	120	1236	1356		5	1.3	36.3	17.6	2.8	1050	1539	450	2589	3039
mean	5.48	42.34	37.16	5.72	1105.8	2056.2	72	3162	3636		mean	3.46	70.8	78.76	3.92	2020.2	4279.2	138	6299.4	6551.4		mean	9.2	35.22	33.66	4	780.6	1514.4	-1560	2295	2409		mean	4.28	50.8	43.36	3.92	1395.6	2568	-108	2017.2	4257.6
SD	6.39937	17.6881	26.8071	3.0979	421.314	1123.92	1302.6	1502.04	2003.96		SD	1.9321	46.7986	60.6345	1.21532	1351.93	2483.05	488.641	3578.76	3488.97		SD	9.77292	18.0945	17.8136	2.03838	305.532	586.173	2473.59	829.884	848.358		SD	4.03881	36.0041	31.9911	1.31415	969.878	1799.45	1011.72	1404.19	2651.83
SE	2.86189	7.91035	11.9885	1.38542	188.417	502.632	582.541	671.735	896.199		SE	0.86406	20.929	27.1166	0.543507	604.603	1110.45	218.527	1600.47	1560.32		SE	4.37058	8.09212	7.96647	0.911592	136.638	262.145	1106.22	371.135	379.397		SE	1.80621	16.1015	14.3069	0.587707	433.743	804.739	452.453	627.973	1185.93
Glucose/Insulin
No	Water0	Water1	Water2	Water12	0-1ｈ	1-2h	2-12ｈ	0-2ｈ total	0-12h total		No	Beer0	Beer1	Beer2	Beer12	0-1ｈ	1-2h	2-12ｈ	0-2ｈ total	0-12h total		No	Shochu0	Shochu1	Shochu2	Shochu12	0-1ｈ	1-2h	2-12ｈ	0-2ｈ total	0-12h total		No	Sake0	Sake1	Sake2	Sake12	0-1ｈ	1-2h	2-12ｈ	0-2ｈ total	0-12h total
1	35.2381	4.66667	10.1471	25.9375	1197.14	444.412	10825.4	1641.55	12466.9		1	35.6522	3.59551	3.77581	25	1177.43	221.14	8632.74	1398.57	10031.3		1	29.6	3.46008	5.63758	29.2857	991.802	272.93	10477	1264.73	11741.7		1	23.0769	3.61345	4.58128	26.875	800.711	245.842	9436.88	1046.55	10483.4
2	33.4783	3.11966	2.03947	12.2667	1097.94	154.774	4291.84	1252.71	5544.55		2	23.3333	3.93484	1.05968	23.3333	818.045	149.836	7317.9	967.881	8285.79		2	5.02703	1.62524	1.728	12.5676	199.568	100.597	4288.67	300.165	4588.84		2	29.6429	3.531	2.67062	16.1111	995.216	186.049	5634.52	1181.26	6815.78
3	6.0355	2.01562	1.86296	9.11765	241.534	116.357	3294.18	357.891	3652.07		3	12.8358	1.12827	1.06621	16.4583	418.923	65.8345	5257.36	484.757	5742.12		3	4.76415	1.84843	2.96774	19.7727	198.377	144.485	6822.14	342.863	7165		3	8.58407	1.12281	1.20833	15.8491	291.206	69.9342	5117.22	361.141	5478.36
4	27.8125	2.91262	3.0179	17.7083	921.754	177.916	6217.87	1099.67	7317.54		4	30	2.26221	1.59869	16.1818	967.866	115.827	5334.15	1083.69	6417.85		4	52.9412	3.67601	2.85714	28.2759	1698.52	195.995	9339.9	1894.51	11234.4		4	42.381	3.17757	1.89024	31.7241	1366.76	152.034	10084.3	1518.79	11603.1
5	27.5862	6.59794	10.6731	30.6897	1025.52	518.13	12408.8	1543.65	13952.5		5	48.3333	5.67647	5.13812	33.2	1620.29	324.438	11501.4	1944.73	13446.2		5	40.9524	9.9115	5.46185	34.8	1525.92	461.201	12078.6	1987.12	14065.7		5	64.6154	4.51791	5.625	31.7857	2074	304.287	11223.2	2378.29	13601.5
mean	26.0301	3.8625	5.54809	19.144	896.778	282.318	7407.62	1179.1	8586.71		mean	30.0309	3.31946	2.5277	22.8347	1000.51	175.415	7608.72	1175.93	8784.65		mean	26.6569	4.10425	3.73046	24.9404	922.836	235.041	8601.25	1157.88	9759.13		mean	33.66	3.19255	3.1951	24.469	1105.58	191.629	8299.23	1297.21	9596.44
SD	11.6795	1.80238	4.46398	9.07387	379.878	184.792	4022.96	508.153	4445.89		SD	13.2957	1.72695	1.8389	7.0231	443.857	100.637	2597.55	540.864	3098.05		SD	21.5118	3.37479	1.73126	8.76086	710.299	141.76	3078.93	812.651	3811.66		SD	21.1615	1.25821	1.85411	8.00184	666.029	89.4977	2750.29	736.601	3374.34
SE	5.22324	0.80605	1.99635	4.05796	169.887	82.6414	1799.12	227.253	1988.26		SE	5.94604	0.772317	0.82238	3.14082	198.499	45.0063	1161.66	241.882	1385.49		SE	9.62037	1.50925	0.774245	3.91798	317.655	63.3971	1376.94	363.428	1704.62		SE	9.4637	0.562687	0.829183	3.57853	297.857	40.0246	1229.97	329.418	1509.05
0-12h
	0	1	2	12			2hAUC	Water	Beer	Shochu	Sake				12hAUC	Water	Beer	Shochu	Sake
Water (n=5)	26.0301	3.8625	5.54809	19.144				1179.1	1175.93	1157.88	1297.21					8586.71	8784.65	9759.13	9596.44
Beer (n=5)	30.0309	3.31946	2.5277	22.8347				227.253	241.882	363.428	329.418					1988.26	1385.49	1704.62	1509.05
Shochu (n=5)	26.6569	4.7	3.73046	24.9404
Sake (n=5)	33.66	3.19255	3.1951	24.469
SE	0	1	2	12
Water (n=5)	5.22324	0.80605	1.99635	4.05796
Beer (n=5)	5.94604	0.772317	0.82238	3.14082
Shochu (n=5)	9.62037	1.50925	0.774245	3.91798
Sake (n=5)	9.4637	0.562687	0.829183	3.57853

## Sheet: insulinogenic index
Insulinogenic index
Blood glucose
No	Water0	Water1	Water2	Water12	0-1ｈ	1-2h	2-12ｈ	0-2ｈ total	0-12h total		No	Beer0	Beer1	Beer2	Beer12	0-1ｈ	1-2h	2-12ｈ	0-2ｈ total	0-12h total		No	Shochu0	Shochu1	Shochu2	Shochu12	0-1ｈ	1-2h	2-12ｈ	0-2ｈ total	0-12h total		No	Sake0	Sake1	Sake2	Sake12	0-1ｈ	1-2h	2-12ｈ	0-2ｈ total	0-12h total
1	74	140	138	83	1980	3900	2700	5880	8580		1	82	192	128	80	3300	4680	-600	7980	7980		1	74	91	84	82	510	810	2400	0	3720		1	90	86	93	86	-120	-30	-1200	0	0
2	77	146	155	92	2070	4410	4500	6480	10980		2	84	157	174	84	2190	4890	0	7080	7080		2	93	85	108	93	-240	210	0	210	210		2	83	131	90	87	1440	1650	1200	3090	4290
3	102	129	87	93	810	360	-2700	810	1170		3	86	168	124	79	2460	3600	-2100	2460	6060		3	101	100	92	87	-30	-300	-4200	0	0		3	97	128	116	84	930	1500	-3900	2430	2430
4	89	150	118	85	1830	2700	-1200	4530	4530		4	87	176	98	89	2670	3000	600	5670	6270		4	90	118	100	82	840	1140	-2400	1980	1980		4	89	136	93	92	1410	1530	900	2940	3840
5	80	128	111	89	1440	2370	2700	3810	6510		5	87	193	93	83	3180	3360	-1200	6540	6540		5	86	112	136	87	780	2280	300	3060	3360		5	84	164	99	89	2400	2850	1500	5250	6750
mean	84.4	138.6	121.8	88.4	1626	2748	1200	4302	6354		mean	85.2	177.2	123.4	83	2760	3906	-660	5946	6786		mean	88.8	101.2	104	86.2	372	828	-780	1050	1854		mean	88.6	129	98.2	87.6	1212	1500	-300	2742	3462
SD	11.327	9.88939	26.0135	4.3359	515.878	1576.16	3014.96	2220.47	3760.99		SD	2.16795	15.5145	32.2149	3.937	471.964	833.655	1047.85	2121.57	769.077		SD	9.93479	13.8456	20	4.54973	484.943	982.38	2559.69	1397.82	1725.25		SD	5.59464	27.9643	10.4738	3.04959	916.008	1023.08	2274.86	1875.25	2484.45
SE	5.06557	4.42267	11.6336	1.93907	230.708	704.879	1348.33	993.023	1681.96		SE	0.969536	6.9383	14.4069	1.76068	211.069	372.822	468.615	948.797	343.942		SE	4.44297	6.19193	8.94427	2.0347	216.873	439.334	1144.73	625.124	771.554		SE	2.502	12.506	4.68402	1.36382	409.651	457.537	1017.35	838.638	1111.08
Insulin
No	Water0	Water1	Water2	Water12	0-1ｈ	1-2h	2-12ｈ	0-2ｈ total	0-12h total		No	Beer0	Beer1	Beer2	Beer12	0-1ｈ	1-2h	2-12ｈ	0-2ｈ total	0-12h total		No	Shochu0	Shochu1	Shochu2	Shochu12	0-1ｈ	1-2h	2-12ｈ	0-2ｈ total	0-12h total		No	Sake0	Sake1	Sake2	Sake12	0-1ｈ	1-2h	2-12ｈ	0-2ｈ total	0-12h total
1	2.1	30	13.6	3.2	837	1182	330	2019	2349		1	2.3	53.4	33.9	3.2	1533	2481	270	4014	4284		1	2.5	26.3	14.9	2.8	714	1086	90	0	1890		1	3.9	23.8	20.3	3.2	597	1089	-210	0	1686
2	2.3	46.8	76	7.5	1335	3546	1560	4881	6441		2	3.6	39.9	164.2	3.6	1089	5907	0	6996	6996		2	18.5	52.3	62.5	7.4	1014	2334	-3330	3348	3348		2	2.8	37.1	33.7	5.4	1029	1956	780	2985	3765
3	16.9	64	46.7	10.2	1413	2307	-2010	1413	3720		3	6.7	148.9	116.3	4.8	4266	7554	-570	4266	11820		3	21.2	54.1	31	4.4	987	1281	-5040	2268	2268		3	11.3	114	96	5.3	3081	5622	-1800	8703	8703
4	3.2	51.5	39.1	4.8	1449	2526	480	3975	4455		4	2.9	77.8	61.3	5.5	2247	3999	780	6246	7026		4	1.7	32.1	35	2.9	912	1911	360	2823	3183		4	2.1	42.8	49.2	2.9	1221	2634	240	3855	4095
5	2.9	19.4	10.4	2.9	495	720	0	1215	1215		5	1.8	34	18.1	2.5	966	1455	210	2421	2631		5	2.1	11.3	24.9	2.5	276	960	120	1236	1356		5	1.3	36.3	17.6	2.8	1050	1539	450	2589	3039
mean	5.48	42.34	37.16	5.72	1105.8	2056.2	72	2700.6	3636		mean	3.46	70.8	78.76	3.92	2020.2	4279.2	138	4788.6	6551.4		mean	9.2	35.22	33.66	4	780.6	1514.4	-1560	1935	2409		mean	4.28	50.8	43.36	3.92	1395.6	2568	-108	3626.4	4257.6
SD	6.39937	17.6881	26.8071	3.0979	421.314	1123.92	1302.6	1636.13	2003.96		SD	1.9321	46.7986	60.6345	1.21532	1351.93	2483.05	488.641	1835.43	3488.97		SD	9.77292	18.0945	17.8136	2.03838	305.532	586.173	2473.59	1334.99	848.358		SD	4.03881	36.0041	31.9911	1.31415	969.878	1799.45	1011.72	3180.51	2651.83
SE	2.86189	7.91035	11.9885	1.38542	188.417	502.632	582.541	731.701	896.199		SE	0.86406	20.929	27.1166	0.543507	604.603	1110.45	218.527	820.831	1560.32		SE	4.37058	8.09212	7.96647	0.911592	136.638	262.145	1106.22	597.027	379.397		SE	1.80621	16.1015	14.3069	0.587707	433.743	804.739	452.453	1422.37	1185.93
Insulinogenic index
No	Water0	Water1	Water2	Water12	0-1ｈ	1-2h	2-12ｈ	0-2ｈ total	0-12h total		No	Beer0	Beer1	Beer2	Beer12	0-1ｈ	1-2h	2-12ｈ	0-2ｈ total	0-12h total		No	Shochu0	Shochu1	Shochu2	Shochu12	0-1ｈ	1-2h	2-12ｈ	0-2ｈ total	0-12h total		No	Sake0	Sake1	Sake2	Sake12	0-1ｈ	1-2h	2-12ｈ	0-2ｈ total	0-12h total
1	0	0.422727	0.179688	0.122222	12.6818	18.0724	36.6667	30.7543	67.4209		1	0	0.464545	0.686957	-0.45	13.9364	34.5451	-135	48.4814	48.4814		1	0	1.4	1.24	0.0375	42	79.2	11.25	121.2	132.45		1	0	-4.975	5.46667	0.175	0	14.75	1692.5	14.75	1707.25
2	0	0.644928	0.944872	0.346667	19.3478	47.694	104	67.0418	171.042		2	0	0.49726	1.78444	0	14.9178	68.4511	0	83.3689	83.3689		2	0	-4.225	2.93333	0	0	0	0	0	0		2	0	0.714583	4.41429	0.65	21.4375	153.866	1519.29	175.304	1694.59
3	0	1.74444	-1.98667	0.744444	52.3333	-7.26667	223.333	52.3333	275.667		3	0	1.73415	2.88421	0.271429	52.0244	138.551	81.4286	190.575	272.004		3	0	-32.9	-1.08889	1.2	0	0	360	0	360		3	0	3.3129	4.45789	0.461538	99.3871	233.124	1475.83	332.511	1808.34
4	0	0.791803	1.23793	-0.4	23.7541	60.892	-120	84.6461	84.6461		4	0	0.841573	5.30909	1.3	25.2472	184.52	390	209.767	599.767		4	0	1.08571	3.33	-0.15	32.5714	132.471	-45	165.043	165.043		4	0	0.865957	11.775	0.266667	25.9787	379.229	3612.5	405.207	4017.71
5	0	0.34375	0.241935	0	10.3125	17.5706	0	27.8831	27.8831		5	0	0.303774	2.71667	-0.175	9.11321	90.6132	-52.5	99.7264	99.7264		5	0	0.353846	0.456	0.4	10.6154	24.2954	120	34.9108	154.911		5	0	0.4375	1.08667	0.3	13.125	45.725	416	58.85	474.85
mean	0	0.789531	0.123552	0.162667	23.6859	27.3925	48.8	52.5317	125.332		mean	0	0.76826	2.67627	0.189286	23.0478	103.336	56.7857	126.384	220.67		mean	0	-6.85709	1.37409	0.2975	17.0374	47.1934	89.25	64.2307	162.481		mean	0	0.0711888	5.4401	0.370641	31.9857	165.339	1743.22	197.324	1940.55
SD	0	0.562592	1.26359	0.423383	16.8778	27.0137	127.015	24.1025	98.9889		SD	0	0.5744	1.71241	0.674102	17.232	59.038	202.231	70.1836	228.844		SD	0	14.7345	1.81549	0.543455	19.2758	57.6097	163.037	75.0324	128.821		SD	0	3.04764	3.90836	0.187337	38.9522	147.868	1159.73	169.178	1284.06
SE	0	0.251599	0.565093	0.189342	7.54797	12.0809	56.8027	10.779	44.2692		SE	0	0.25688	0.765811	0.301467	7.70639	26.4026	90.4402	31.3871	102.342		SE	0	6.58949	0.81191	0.243041	8.6204	25.7638	72.9122	33.5555	57.6106		SE	0	1.36295	1.74787	0.0837795	17.42	66.1286	518.649	75.6585	574.25
0-12h
	0	1	2	12							2hAUC	Water	Beer	Shochu	Sake			12hAUC	Water	Beer	Shochu	Sake
Water (n=5)	0	0.789531	0.123552	0.162667								52.5317	126.384	64.2307	197.324				125.332	220.67	162.481	1940.55
Beer (n=5)	0	0.76826	2.67627	0.189286								10.779	31.3871	33.5555	75.6585				44.2692	102.342	57.6106	574.25
Shochu (n=5)	0	-0.34636	1.37409	0.2975
Sake (n=5)	0	0.0711888	5.4401	0.370641
SE	0	1	2	12
Water (n=5)	0	0.251599	0.565093	0.189342
Beer (n=5)	0	0.25688	0.765811	0.301467
Shochu (n=5)	0	1.17288	0.81191	0.243041
Sake (n=5)	0	1.36295	1.74787	0.0837795
