# Supplementary material for: Acute effects of traditional Japanese alcohol beverages on blood glucose and polysomnography levels in healthy subjects
Source: PeerJ. 2016 Apr 4;4:e1853. doi: 10.7717/peerj.1853 (PMC4824916; doi:10.7717/peerj.1853)
Supplement: Supplemental Information 2 [file peerj-04-1853-s002.xls]

## Sheet: Table 1
			takamine																yamakawa																okutu
			Beer	Beer	Beer	Beer	Shochu	Shoshu	Shoshu	Shoshu	Water	Water	Water	Water	Sake	Sake	Sake	Sake	Shoshu	Shoshu	Shoshu	Shoshu	Sake	Sake	Sake	Sake	Beer	Beer	Beer	Beer	Water	Water	Water	Water	Water	Water	Water	Water	Beer	Beer	Beer	Beer	Shoshu	Shoshu	Shoshu	Shoshu	Shoshu	Sake	Sake
			1216	1216	1216	1216	114	114	114	114	121	121	121	121	128	128	128	128	1211	1211	1211	1211	1218	1218	1218	1218	114	114	114	114	121	121	121	121	129	129	129	129	1216	1216	1216	1216	115	115	115	115	120	120	120
		normal	1899-12-31 19:00:00	1899-12-31 20:00:00	1899-12-31 21:00:00	1899-12-31 07:00:00	1899-12-31 19:10:00	1899-12-31 20:10:00	1899-12-31 21:10:00	1899-12-31 07:10:00	1899-12-31 19:00:00	1899-12-31 20:00:00	1899-12-31 21:00:00	1899-12-31 07:00:00	1899-12-31 19:00:00	1899-12-31 20:00:00	1899-12-31 21:00:00	1899-12-31 07:00:00	1899-12-31 19:10:00	1899-12-31 20:10:00	1899-12-31 21:10:00	1899-12-31 07:10:00	1899-12-31 19:10:00	1899-12-31 20:10:00	1899-12-31 21:10:00	1899-12-31 07:10:00	1899-12-31 19:00:00	1899-12-31 20:00:00	1899-12-31 21:00:00	1899-12-31 07:00:00	1899-12-31 19:10:00	1899-12-31 20:10:00	1899-12-31 21:10:00	1899-12-31 07:10:00	1899-12-31 19:00:00	1899-12-31 20:00:00	1899-12-31 21:00:00	1899-12-31 07:00:00	1899-12-31 19:10:00	1899-12-31 20:10:00	1899-12-31 21:10:00	1899-12-31 07:10:00	1899-12-31 19:00:00	1899-12-31 20:00:00	1899-12-31 21:00:00	1899-12-31 07:00:00	1899-12-31 19:00:00	1899-12-31 20:00:00	1899-12-31 21:00:00
BS	mg/dl	70～109	87	193	93	83	86	112	136	87	80	128	111	89	84	164	99	89	90	118	100	82	89	136	93	92	87	176	98	89	89	150	118	85	74	140	138	83	82	192	128	80	74	91	84	82	90	86	93
PT	Sec.		10.8	11.1	10.8	10.9	10.8	10.9	10.8	10.6	11.3	11	11	10.8	11	11.1	10.9	11	12.2	12	11.9	12.2	11.3	11.5	11.6	11.6	11.4	11.7	11.3	11.5	11.8	11.7	11.4	11.9	12.2	13.1	13.2	13.1	12.2	12.7	12.6	12.3	12.6	12.7	12.6	12.8	13.1	13.3	12.8
PT act.	％	Over 70	over100	over100	over100	over100	over100	over100	over100	over100	over100	over100	over100	over100	100以上	over100	over100	over100	93.3	95.9	97.3	93.3	over100	over100	over100	over100	over100	over100	over100	over100	98.7	over100	over100	97.3	93.3	82.7	81.6	82.7	93.3	87.1	88.3	92	88.3	87.1	88.3	86	82.7	80.6	86
PT-INR			0.92	0.95	0.92	0.93	0.92	0.93	0.92	0.9	0.97	0.94	0.94	0.92	0.94	0.95	0.93	0.94	1.04	1.03	1.02	1.04	0.97	0.98	0.99	0.98	0.97	1	0.97	0.98	1.01	1	0.97	1.02	1.04	1.12	1.13	1.12	1.04	1.09	1.08	1.05	1.08	1.09	1.08	1.1	1.12	1.14	1.1
APTT	秒	25-45	23.8	24.7	23.6	24.4	23.2	25.1	23.7	22.9	24.4	25	24.2	24.3	24	24.7	24.3	24.2	30.7	28.4	28.3	30.1	27.7	29.1	27.8	28.1	27.1	30.6	27	26.7	26.9	28.3	26.6	27.6	32.7	34.9	34.1	34.4	30.9	33.2	31.7	30.5	31.7	32.1	31.8	32	31.4	32.5	31.6
Hepapurasuchin	％	70-130	105	96	108	107	109	98	97	101	110	106	107	106	111	106	112	105	91	9	94	86	113	107	109	13	116	100	108	98	104	94	99	88	92	77	73	70	88	76	79	84	86	85	88	87	79	78	79
Thrombotest	％	80-100	97	93	100	100	97	83	98	92	100	100	100	99	100	100	100	92	94	100	100	93	100	100	100	100	100	100	100	91	100	100	100	83	77	70	65	53	82	73	77	77	88	85	94	79	67	69	73
ADP	％	30-60	90	97	101	101	80	80	80	80	92	96	86	80	86	84	80	80	102	98	99	91	110	71	84	102	76	76	78	96	98	105	92	88	82	110	90	100	95	96	94	92	84	82	86	91	74	80	81
collagen	％	50-75	92	98	98	103	70	72	84	81	84	86	83	82	83	54	80	68	109	102	102	95	110	74	90	110	76	74	70	86	102	108	93	80	80	110	94	94	102	98	94	96	85	74	82	81	76	72	67
Lactic acid	mg/dl	3.7-16.3	4	13	16.4	6.9	6.7	12	21.9	9.2	6.9	12.8	10.2	7.9	5.7	19.3	17.4	6.6	6.2	20.8	19.5	7.1	9.3	14.5	15.8	7.5	9.8	21.4	20.9	10.6	10.5	18.3	10.5	9.3	9.9	8.6	6.4	4.3	5.5	11.1	14.7	9.9	5.2	14.6	14.3	7.4	6.9	18.3	17.5
Total katone	μmol/L	26.0-122	192	48.4	33.6	36.4	82.7	66.9	54.9	34.6	37.5	28.9	32.4	26.8	39.9	39.4	28.4	25.2	68.6	71.7	92.1	70.7	62.2	71.3	67.9	34.1	54.6	89.6	88.3	20.8	52.4	29.6	30.6	30.5	323	37.3	34.8	101	213	66.7	61.1	38.8	6.6	84.8	95.9	27	30.6	58.7	51.5
Acetoacetic acid	μmol/L	13.0-69.0	48	17	12.5	13.9	20.5	14.2	15.2	13.6	17.6	15.5	18.6	10.0以下	11.9	10.5	10.0以下	10.0以下	25.1	10.0以下	10.0以下	26.9	21.7	10.0以下	10.0以下	10.9	17.1	11.4	10.3	10.0以下	20.5	11.7	20.2	14.8	63	11.8	23.1	25.3	49	10.8	13	15.8	34.8	17.3	18.4	12.9	17.2	10.0以下	10.0以下
3-hydroxybuttyric acid	μmol/L	Lower 76.0	144	31.4	21.1	22.5	62.2	52.7	39.7	21	19.9	13.4	13.8	16.9	28	28.9	18.6	15.3	43.8	66.2	93.7	43.8	40.5	62.5	59	23.2	37.5	78.2	78	12.2	31.9	17.9	10.4	15.7	260	25.5	11.7	75.7	164	55.9	48.1	23	25.8	67.5	77.5	14	13.4	50.3	44.5
Ethanol	mg/dl	not until 0.1	not until 0.1	0.9	0.6	not until 0.1	not until 0.1	0.8	0.7	not until 0.1	not until 0.1	not until 0.1	not until 0.1	not until 0.1	not until 0.1	0.9	0.7	0.1未満	not until 0.1	0.5	0.4	not until 0.1	not until 0.1	0.3	0.4	not until 0.1	not until 0.1	0.5	0.3	not until 0.1	not until 0.1	not until 0.1	not until 0.1	not until 0.1	not until 0.1	not until 0.1	not until 0.1	not until 0.1	not until 0.1	0.8	0.8	not until 0.1	not until 0.1	0.7	0.6	not until 0.1	not until 0.1	0.7	0.6
Insulin	μU/ml		1.8	34	18.1	2.5	2.1	11.3	24.9	2.5	2.9	19.4	10.4	2.9	1.3	36.3	17.6	2.8	1.7	32.1	35	2.9	2.1	42.8	49.2	2.9	2.9	77.8	61.3	5.5	3.2	51.5	39.1	4.8	30	13.6	3.2	2.3	2.3	53.4	33.9	3.2	2.5	26.3	14.9	2.8	3.9	23.8	20.3
[truncated: 49 more columns]

## Sheet: Table 2
Table 2 raw data	Tester's name	Time	Mark Water:0 Beer:1 Shochu:2 Sake:3	Headach	Palpitation	Appetite	Hanger	Fullness	Tipsiness	Drunken sickness	Weariness	Happiness	Relaxation	Nausea
	okutu	1900	0	22	20	78	77	77	0	0	50	8	10	0
		2000	0	0	20.5	22.5	22	77.5	0	0	0	21.5	50.5	0
		2100	0	0	24	24	24.5	80.5	19.5	17.5	18	48.5	15.5	0
		700	0	20.5	19.5	48.5	49	21	0	0	0	50	49.5	0
		1900	1	0	51.5	100	100	0	0	0	50.5	51	74.5	0
		2000	1	0	52	50	49.5	25	87.5	0	0	50.5	51	0
		2100	1	0	0	49.5	21	64	47.5	9	12.5	75	75.5	0
		700	1	0	0	78.5	78	16.5	0	0	47	50	50	0
		1900	2	0	0	73.5	72	24	0	0	0	52	51.5	0
		2000	2	0	26.5	0	0	78	76.5	0	0	49.5	50.5	0
		2100	2	0	0	0	0	85	76	0	0	51.5	50.5	0
		700	2	0	0	50.5	50.5	30	0	0	0	50.5	50	0
		1900	3	2.5	0	76	77	0	51.5	2.5	0	51.5	49.5	0
		2000	3	0	0	23.5	23	80	78	0	0	59.5	56.5	0
		2100	3	0	0	23	23.5	63	63.5	0	0	53.5	46.5	0
		700	3	0	0	74	71	0	0	0	0	49.5	48.5	0
	yoshizaki	1900	0	0	21	29.5	30.5	4	0	29.5	27	0	13.5	17.5
		2000	0	0	4	0	0	10	0	25	23.5	23.5	21.5	0
		2100	0	0	0	5.5	5.5	83.5	0	0	4.5	6	5	0
		700	0	0	0	30	30	30.5	0	0	0	19.5	31.5	0
		1900	1	0	0	39.5	59	40.5	0	48.5	4.5	0	4	27
		2000	1	0	50.5	20	36	74	73.5	0	0	50	48	0
		2100	1	0	19.5	19	19.5	48.5	48.5	0	2.5	29	28.5	0
		700	1	0	10.5	10	14	16	0	0	6	12.5	39	0
		1900	2	65.5	50	40.5	31.5	66	11.5	15	8.5	9	50	9
		2000	2	0	65	0	0	100	0	100	100	0	0	68
		2100	2	0	69	0	0	100	13.5	22.5	12	11.5	24	22.5
		700	2	0	9.5	37.5	10	40.5	7	7	8.5	31.5	47.5	6
		1900	3	0	5	33	32.5	32.5	0	0	0	10.5	15	0
		2000	3	0	5.5	0	0	79.5	9	22.5	2.5	0	0	20.5
		2100	3	0	8	0	0	0	0	100	8	0	8	71
		700	3	0	3.5	31.5	20	20	0	0	0	20.5	22	0
	kubota	1900	0	0	0	83.5	84	0	0	0	0	52	51.5	0
		2000	0	0	0	0	0	100	0	0	0	72.5	53.5	0
		2100	0	0	0	0	0	82.5	0	0	0	69.5	50	0
		700	0	0	0	48	47	25	0	0	0	30.5	49.5	0
		1900	1	0	0	81.5	84	0	0	0	0	48.5	47.5	0
		2000	1	0	0	14	0	81	52	0	0	52	79	0
		2100	1	0	0	18	0	72	0	0	0	52	52	0
		700	1	0	0	48.5	46.5	0	0	0	0	49.5	50	0
		1900	2	0	0	100	79	0	0	0	0	0	52	0
		2000	2	0	0	15	0	92.5	16	16	15	17	18.5	22
		2100	2	0	0	0	0	52.5	14	0	0	16.5	78	0
		700	2	0	0	72	68.5	0	0	0	0	0	48.5	0
		1900	3	0	0	100	100	0	0	0	0	46	75	0
		2000	3	0	0	10.5	0	100	20.5	0	7.5	49.5	51	0
		2100	3	0	0	16.5	17	84	23	0	0	51.5	53.5	0
		700	3	0	0	50	76	0	0	0	0	51.5	50.5	0
	kawasaki	1900	0	0	0	100	100	0	0	0	62	33	51	0
		2000	0	0	0	0	0	100	0	0	75	31	40	0
		2100	0	0	0	61	60	45	0	0	61	51	65	0
		700	0	0	0	75	76	0	0	6	59	52	52	0
		1900	1	0	0	75	87	22	0	0	0	0	51	0
		2000	1	0	94	0	0	8	42	5	66	0	12	0
		2100	1	0	0	0	0	52	8	0	6	8	50	0
		700	1	0	0	65	66	0	0	0	38	0	32	0
		1900	2	0	0	89	88	0	0	0	21	0	18	0
		2000	2	0	62	0	14	35	21	0	34	14	38	0
		2100	2	0	0	26	25	14	0	0	0	18	38	0
		700	2	0	0	51	50	0	0	0	0	0	51	0
		1900	3	0	0	100	100	0	0	0	11	0	51	0
		2000	3	0	100	0	100	87	3	51	54	7	54	24
		2100	3	0	73	0	0	51	0	78	84	0	0	49
		700	3	25	0	0	64	0	0	100	100	0	8	59
	takamine	1900	0	0	0	100	100	0	0	0	0	74.5	100	0
		2000	0	0	0	0	0	100	0	0	0	78.5	100	0
		2100	0	0	0	0	0	100	0	0	0	81.5	100	0
		700	0	0	0	0	0	0	0	0	0	57	100	0
		1900	1	0	50.5	100	100	0	0	0	0	53	100	0
		2000	1	21	73	85	84	5	88	10	0	81	93.5	0
		2100	1	5.5	22.5	85	94	12	92	3	0	80	90.5	0
		700	1	10	0	0	0	0	0	14	24	7	81.5	0
		1900	2	0	0	77.5	89.5	0	0	0	0	61	51.5	0
		2000	2	12	32	63	51	51.5	100	0	0	79	82	0
		2100	2	75.5	86	0	0	100	86.5	26.5	0	78.5	100	18
		700	2	0	0	8.5	0	80.5	0	0	0	77	83.5	0
		1900	3	0	0	87	86	0	0	0	0	48.5	100	0
		2000	3	7	85	0	0	100	100	0	0	100	100	0
		2100	3	0	51	0	0	100	84.5	0	0	87	100	0
		700	3	0	0	0	0	20	0	0	0	74	74	0
	yamakawa	1900	0	0	27	74	83	0	0	0	17.5	24.5	64	0
		2000	0	0	31	17	19	48	0	0	15	26	51	0
		2100	0	0	24	30	38	20	0	0	10	34	59	0
		700	0	0	26	59	61	0	0	0	28	18	33	0
		1900	1	0	24	76	87	0	0	0	0	29	48	0
		2000	1	3	30	13	11	71	45	12.5	20	37	59	0
		2100	1	4	22	13	11	54	39	28	35	36	59	0
		700	1	0	20	57	64	0	18	0	32	30	46	0
		1900	2	0	0	86	37	94	0	0	14	41	73	0
		2000	2	46	53	77	80	58	63	33	43	53	52	0
		2100	2	31	41	38	51	18	40	0	26	39	52	0
		700	2	0	40	69	68	0	0	0	61	31	25	0
		1900	3	11	31	63	38	56	60	32	52	42	65	2
		2000	3	1	40	59	46	65	61	41	55	56	55	0
		2100	3	0	35	45	40	42	29	6	28	23	40	0
		700	3	0	27	66	67	1	0	0	0	39	59	1

## Sheet: Table 3
Table 3 raw data				Total PSG min	Sleep latency min	REM sleep latencymin	Stage1min	Stage2min	Stage3min	Stage4min	StageREMmin	Total sleep time min	Sleep efficiency %	Cs	Total weak time	（AHI）/h	Apnea hypopnea index /h	snore time	snore％	Obstructive respiratory events time	Central respiratory events time	Mixed respiratory events time	Hypopnea events time	αwave sec	αwave %	PLM /h	PLM total time
	okutu	Water	1	523	85.5	222	44.5	330.5	26	26	97	22.5	72.6	12.6	99	0.7	6	1	0	0	1	0	5	429	0.993
		Beer	2	456.5	158.5	152	61	290	21.5	34	66	26	63.4	11.4	87	0.1	1	0	0	0	0	0	1	658.5	1.524
		Shochu	3	525	149.5	94	36.5	346.5	24	18	100	6	73	10.7	85	0.7	6	17	0.1	1	1	0	4	686.5	1.589
	yoshizaki	Water	1	464	192	168.5	20.5	256.5	54.5	49.5	83	18.5	64.4	14.6	99	6.1	47	104	0.3	8	1	0	38	738.5	1.709
		Beer	2	530.5	133	198.5	24	322	60	54	70.5	18	73.7	25.1	192	66	58	317	0.9	13	0	0	45	371.5	0.86	0	0
		Shochu	3	512	128.5	70.5	17.5	341	43	45.5	107	21.5	71.1	13.6	108	4	34	427	1.4	4	0	0	30	323	0.748
	kubota	Water	1	420	160.5	239	21.5	238.5	48.5	61	50.5	8	58.3	7	51	0	0	2	0	0	0	0	0	47.5	0.11	0.4	4
		Beer	2	439	234.5	145	18.5	262	31	43	84.5	21	61	6.7	39	0.7	5	3	0	0	1	0	4	62	0.144	0	0
		Shochu	3	545.5	135	79	21	313.5	47.5	55	108.5	9.5	75.8	7.7	57	0.9	8	4	0	0	1	0	7	10.5	0.024	0	0
	kawasaki	Water	1	429	175	161	23.5	256.5	21	60.5	67.5	81.5	59.6	8.4	35	1.3	9	7	0.1	0	1	0	8	22	0.051	1	8
		Beer	2	409	264.5	176.5	22	222.5	44.5	58	73.5	9.5	56.8	8.2	46	0.9	6	7	0.1	1	1	0	4	865	2.002	0.7	5
		Shochu	3	440.5	221	168	23.5	228	34.5	68.5	86	12.5	61.2	8.6	54	0.4	3	16	0.2	0	2	0	1	121	0.28	0	0
	yamakawa	Water	1	308.5	142.5	138	15.5	166.5	23	64	39.5	14	42.8	4.2	32	1.4	7	0	0	0	5	0	2	23	0.053	17.2	162
		Beer	2	519	132.5	144	22	297	26.5	54	119.5	13	72.1	6.2	37	0.5	4	0	0	0	3	0	1	10.5	0.024	12.5	120
		Shochu	3	319.5	381	71.5	9.5	165	35.5	50	60	11.5	44.4	5.9	29	0.6	3	0	0	0	1	0	2	31	0.072	0	0
	takamine	Water	1	511.5	163	70.5	22	302	37	25	125.5	17	71	6.1	42	0.6	5	898		0	0	0	5	77.5	0.179	0	0
		Beer	2	496	139	81.5	60	300	31	105	105	40	68.9	16.3	117	1.3	11	582	1.8	0	1	0	10	65	0.15	0	0
		Shochu	3	512.5	132.5	56.5	51	324	17.5	22.5	100	17	71.2	13.9	106	3	26	1820	5	1	2	1	22	279.5	0.647	0	0
					okutu
					yoshizaki
					kubota
					kawasaki
					takamine
					yamakawa
